# Supplementary material for: Biomarkers and Predictive Factors for Treatment Response to Tumor Necrosis Factor-α Inhibitors in Patients with Psoriasis
Source: MDPI journal article supplement (doi:10.3390/jcm12030974), 2023-01-27
Supplement: s1 [file s1]

Supplemental Table S2. The relationship between percent reduction of psoriasis area and severity index (PASI) at week 12 versus sex, presence or absence of arthritis, scalp, or genital lesions

|                                                  |                                 | Sex           |               |          | Arthritis     |               |          | Scalp lesions |               |          | Genital lesions |               |          |
|--------------------------------------------------|---------------------------------|---------------|---------------|----------|---------------|---------------|----------|---------------|---------------|----------|-----------------|---------------|----------|
| Biologics<br>( <i>n</i> )                        |                                 | Male          | Female        | <i>p</i> | Absence       | Presence      | <i>p</i> | Absence       | Presence      | <i>p</i> | Absence         | Presence      | <i>p</i> |
| Whole                                            | <i>n</i> (%)                    | 43 (78.2)     | 12 (21.8)     |          | 17 (30.9)     | 38 (69.1)     |          | 13 (23.6)     | 41 (74.5)     |          | 31 (56.3)       | 17 (30.9)     |          |
| TNF- $\alpha$<br>inhibitors<br>(55) <sup>†</sup> | Percent<br>reduction<br>of PASI | 67<br>[37-86] | 77<br>[54-82] | 0.596    | 74<br>[22-80] | 71<br>[50-87] | 0.466    | 77<br>[48-77] | 75<br>[40-88] | 0.511    | 74<br>[37-90]   | 67<br>[50-78] | 0.804    |
| IFX<br>(28) <sup>†</sup>                         | <i>n</i> (%)                    | 6 (21.4)      | 22 (78.6)     |          | 13 (46.4)     | 15 (53.6)     |          | 7 (25.9)      | 20 (71.4)     |          | 15 (53.6)       | 8 (28.6)      |          |
|                                                  | Percent<br>reduction<br>of PASI | 76<br>[28-90] | 81<br>[56-91] | 0.37     | 74<br>[9-78]  | 83<br>[70-91] | 0.0557   | 77<br>[62-82] | 77<br>[34-91] | 0.846    | 82<br>[61-91]   | 69<br>[43-77] | 0.42     |
| ADA<br>(15) <sup>‡</sup>                         | <i>n</i> (%)                    | 12 (80.0)     | 3 (20.0)      |          | 4 (26.7)      | 11 (73.3)     |          | 4 (26.7)      | 11 (73.3)     |          | 10 (66.7)       | 3 (20)        |          |
|                                                  | Percent<br>reduction<br>of PASI | 56<br>[33-71] | 79<br>[67-81] | 0.426    | 76<br>[58-88] | 56<br>[37-73] | 0.327    | 50<br>[25-67] | 57<br>[47-84] | 0.395    | 55<br>[35-79]   | 67<br>[49-73] | 1        |
| CZP<br>(12) <sup>‡</sup>                         | <i>n</i> (%)                    | 9 (75.0)      | 3 (25.0)      |          | 0 (0)         | 12 (100)      |          | 2 (16.7)      | 10 (83.3)     |          | 6 (50)          | 6 (50)        |          |

|  |                                 |          |             |       |          |            |             |      |             |             |      |
|--|---------------------------------|----------|-------------|-------|----------|------------|-------------|------|-------------|-------------|------|
|  | Percent<br>reduction<br>of PASI | 66.0 ± 2 | 50.2 ± 27.9 | 0.397 | Not done | 61.1 ± 7.9 | 62.2 ± 29.2 | 0.96 | 57.2 ± 36.0 | 66.9 ± 14.0 | 0.55 |
|--|---------------------------------|----------|-------------|-------|----------|------------|-------------|------|-------------|-------------|------|

TNF- $\alpha$ , tumor necrosis factor- $\alpha$ ; IFX, infliximab; ADA, adalimumab; CZP, certolizumab pegol

†Data are provided as the median [interquartile range], analyzed by Mann-Whitney U test.

‡Data are provided as mean ± standard deviation, analyzed by Student's *t*-test.
