# Supplementary material for: Biomarkers and Predictive Factors for Treatment Response to Tumor Necrosis Factor-α Inhibitors in Patients with Psoriasis
Source: MDPI journal article supplement (doi:10.3390/jcm12030974), 2023-01-27
Supplement: s1 [file s1]

|  |                                 |                |                |       |                |                |      |                 |                  |       |                  |                  |       |
|--|---------------------------------|----------------|----------------|-------|----------------|----------------|------|-----------------|------------------|-------|------------------|------------------|-------|
|  | Percent<br>reduction<br>of PASI | 65.2 ±<br>26.6 | 57.6 ±<br>28.8 | 0.646 | 57.2 ±<br>36.0 | 66.9 ±<br>14.0 | 0.55 | 62.82 ±<br>30.0 | 61.64 ±<br>26.81 | 0.946 | 68.79 ±<br>13.41 | 52.59 ±<br>38.38 | 0.319 |
|--|---------------------------------|----------------|----------------|-------|----------------|----------------|------|-----------------|------------------|-------|------------------|------------------|-------|

TNF- $\alpha$ , tumor necrosis factor- $\alpha$ ; IFX, infliximab; ADA, adalimumab; CZP, certolizumab pegol

†Data are provided as the median [interquartile range], analyzed by Mann-Whitney U test.

‡Data are provided as mean  $\pm$  standard deviation, analyzed by Student's *t*-test.
